# Supplementary material for: Older age, lack of vaccination and infection with variants other than Omicron associated with severity of COVID-19 and in-hospital mortality in Pakistan
Source: bioRxiv or medRxiv preprint supplement (doi:10.1101/2023.01.30.23285170), 2023-02-01

**Supplementary Figure 1. Description of COVID-19 cases and deaths in Pakistan.** The graphs depict data for COVID-19 between 1 April 2021 and 28 February 2022. A, Cases reported and B, Deaths reported. Source, John Hopkins, Corona Research Center <https://coronavirus.jhu.edu/region/pakistan>

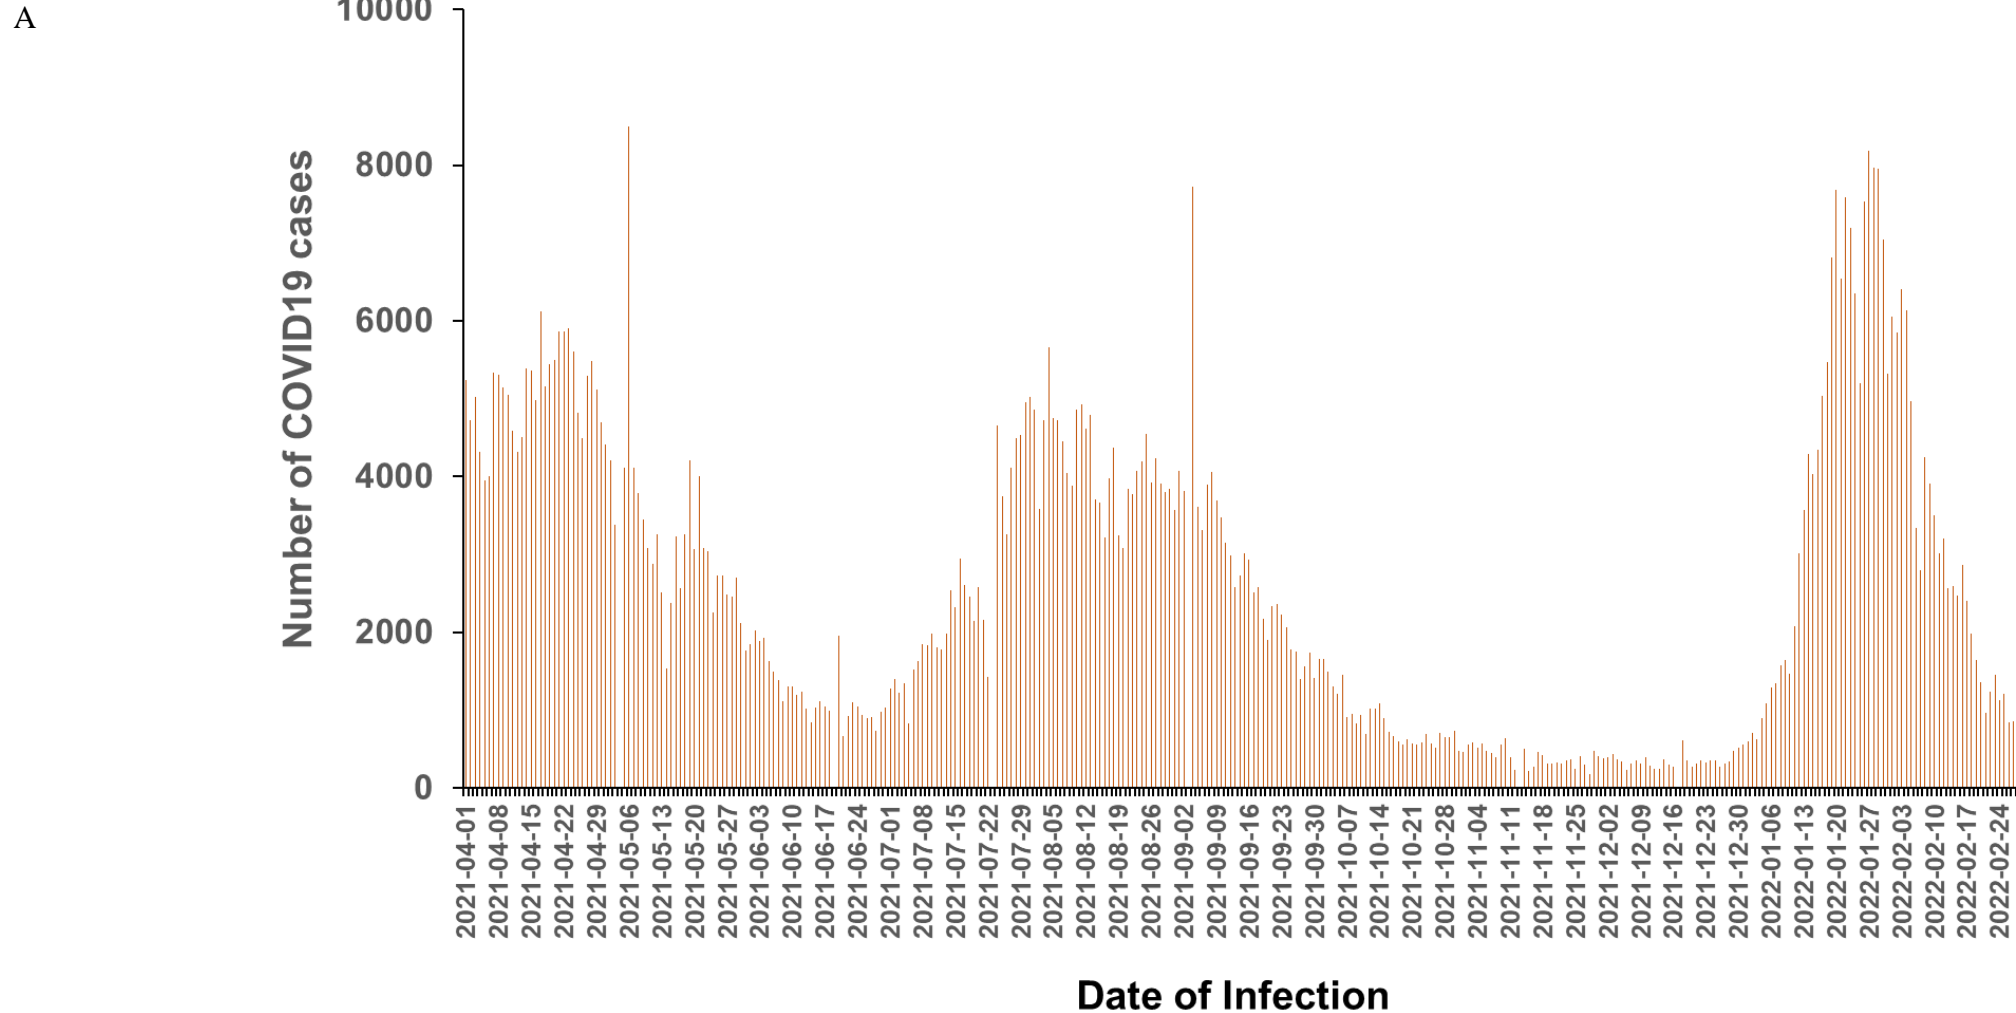

B  
Number of deaths

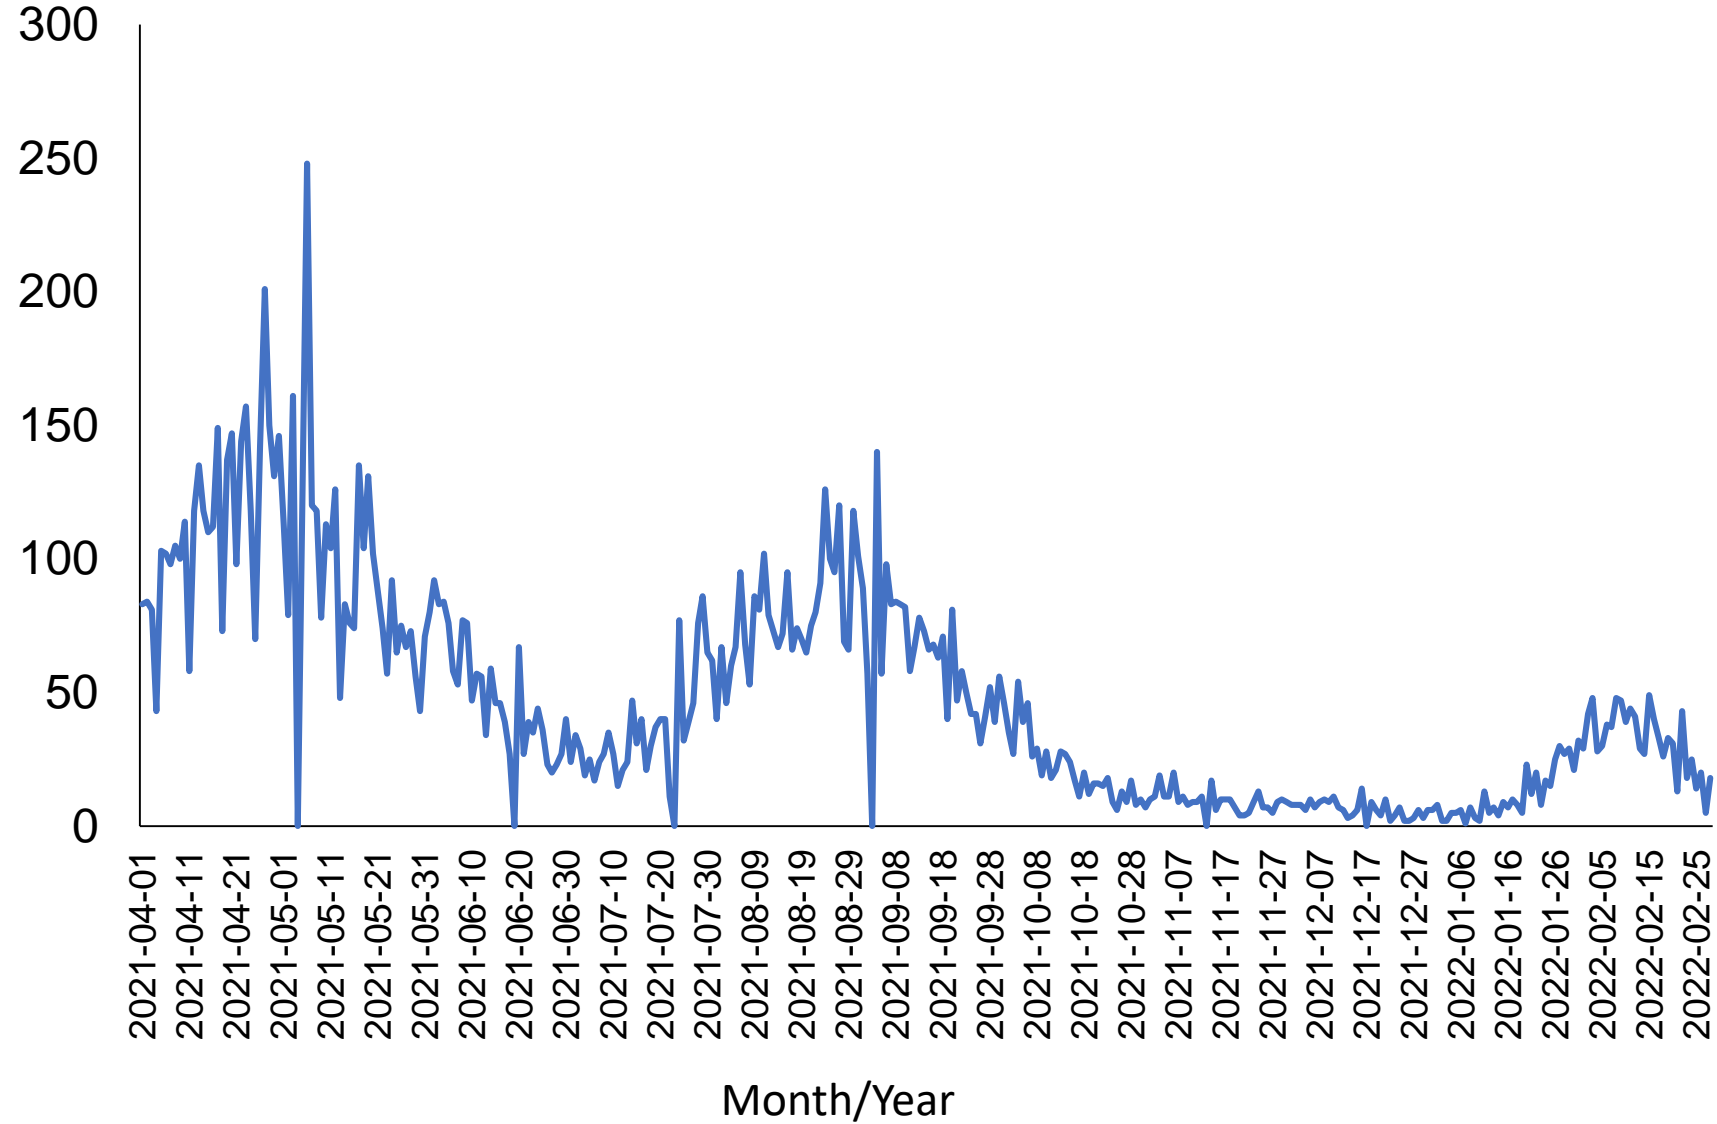

Supplement: Supplementary file [file media-2.pdf]
